# Supplementary material
Source: PubMed Central journal article supplement (PMC6557635)

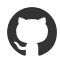

richrr Updated files after adding puc compatibility to the gene microbe network cff07048 2 days ago

1 contributor

97 lines (76 sloc) | 4.07 KB

Raw Blame History

```
1 #library(TransNetDemo)
2 library(stringr)
3 library(ProNet)
4 library(igraph)
5
6
7 individualPvalueCutoff = 0.3
8 combinedPvalueCutoff = 0.05
9 combinedFDRcutoff = 0.2
10
11 # groups to compare
12 groupA = "HFHS"
13 groupB = "NCD"
14 sampleIdColName = "SampleID"
15 factorColName = "Factor"
16 geneSymbolColName = "IdSymbol"
17 # fold change column based on mean or median
18 foldchVar = "FoldChange_HFHS_NCD" # or "FoldChange_Median_HFHS_NCD"
19
20 # map files
21 mapf1 = system.file("extdata", "mapping_file.rand.1.tsv", package = "TransNetDemo")
22 mapf2 = system.file("extdata", "mapping_file.rand.2.tsv", package = "TransNetDemo")
23
24 # gene files
25 genef1 = system.file("extdata", "gene_file_1.tsv", package = "TransNetDemo")
26 genef2 = system.file("extdata", "gene_file_2.tsv", package = "TransNetDemo")
27
28 # genes
29 Comp_genes = Compare_groups(mapf1, genef1, sampleIdColName, factorColName , groupA, groupB, geneSymbolColName)
30
31 # Select differentially abundant elements:
32 ##### (i) using a significance threshold #####
33 Sign_genes = Comp_genes[which(Comp_genes$FDR < 0.05),]
34 # this data has been saved as "Sign_genes_precomputed_1"
35 ##### ##### #####
36 # OR
37 ##### (ii) in case you have multiple datasets, we recommend meta-analysis #####
38 ## we have already run these steps and stored the data under the variable "Sign_genes_metaanalysis_precomputed" ##
39 Comp_genes1 = Comp_genes
40 Comp_genes2 = Compare_groups(mapf2, genef2, sampleIdColName, factorColName , groupA, groupB, geneSymbolColName)
41 numbDatasets=2 # number of datasets
42
43 s_df = merge(Comp_genes1, Comp_genes2, by="row.names")
44 rownames(s_df) = rownames(Comp_genes1)
45 s_df = Check_consistency(s_df, foldchVar, 1, numbDatasets)
46 comb_in_df = Calc_combined(s_df)
47 Sign_genes = Apply_sign_cutoffs(comb_in_df, individualPvalueCutoff, combinedPvalueCutoff, combinedFDRcutoff )
48
49 # if this returns TRUE, you did everything correct!
50 identical(rownames(Sign_genes), rownames(Sign_genes_metaanalysis_precomputed))
51 #write.csv(Sign_genes,"Sign_genes_File.csv", quote=FALSE)
52 ##### ##### #####
53
```

```

54 # gene pairs
55
56 Corr_pairs = Correlation_in_group(mapf1, genef1, sampleIdColName, factorColName, groupA, geneSymbolColName, rownames(Sign_genes))
57
58 # Select significant correlations:
59 ##### (i) using a significance threshold #####
60 Sign_pairs = Corr_pairs[which(Corr_pairs$pvalue < 0.05 & Corr_pairs$FDR < 0.1),]
61 #####
62 # OR
63 ##### (ii) in case you have multiple datasets, we recommend meta-analysis #####
64 ## we have already run these steps and stored the data under the variable "Sign_genepairs_metaanalysis_precomputed" ##
65 Corr_pairs1 = Corr_pairs
66 Corr_pairs2 = Correlation_in_group(mapf2, genef2, sampleIdColName, factorColName, groupA, geneSymbolColName, rownames(Sign_genes))
67
68 s_df = merge(Corr_pairs1, Corr_pairs2, by="row.names")
69 rownames(s_df) = rownames(Corr_pairs1)
70 s_df = Check_consistency(s_df, "Coefficient", 0, numbDatasets)
71 comb_in_df = Calc_combined(s_df)
72 Sign_pairs = Apply_sign_cutoffs(comb_in_df, individualPvalueCutoff, combinedPvalueCutoff, combinedFDRcutoff )
73
74 # if this returns TRUE, you did everything correct!
75 identical(rownames(Sign_pairs), rownames(Sign_genepairs_metaanalysis_precomputed))
76 #write.csv (Sign_pairs, "Sign_genes_pairs_File.csv", quote=FALSE)
77 #####
78
79
80 genes_df = Calc_median_val(Sign_genes, foldchVar)
81 identical(genes_df, Gene_df_precomputed)
82 pairs_df = Calc_median_val(Sign_pairs, "Coefficient")
83 outNetwork = Puc_compatible_network(pairs_df, genes_df)
84
85 # if this returns TRUE, you did everything correct!
86 identical(outNetwork[,c("partner1", "partner2")], Gene_network_precomputed[,c("partner1", "partner2")])
87 #write.csv (outNetwork, "gene-networkFile.csv", quote=FALSE)
88
89 cluster1 = Identify_subnetworks(outNetwork)
90 summary(cluster1)
91
92 # if this returns TRUE, you did everything correct!
93 identical(get.edgelist(cluster1), get.edgelist(genes_mcode_cluster1_precomputed)) # OR #sum(get.adjacency(cluster1) != get.adjacency(genes_
94 #write_graph(cluster1, "genes_mcode_cluster1_edges.txt", "ncol")
95
96 plot(cluster1, vertex.label=NA, layout= layout_in_circle, vertex.size=3)

```

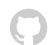



richrr Updated files after adding puc compatibility to the gene microbe network cff07048 2 days ago

1 contributor

98 lines (76 sloc) | 4.19 KB

Raw Blame History

```
1 #library(TransNetDemo)
2 library(stringr)
3 library(ProNet)
4 library(igraph)
5
6
7 individualPvalueCutoff = 0.3
8 combinedPvalueCutoff = 0.05
9 combinedFDRcutoff = 0.2
10
11 # groups to compare
12 groupA = "HFHS"
13 groupB = "NCD"
14 sampleIdColName = "SampleID"
15 factorColName = "Factor"
16 microbeSymbolColName = "IdSymbol"
17 # fold change column based on mean or median
18 foldchVar = "FoldChange_HFHS_NCD" # or "FoldChange_Median_HFHS_NCD"
19
20 # map files
21 mapf1 = system.file("extdata", "mapping_file.rand.1.tsv", package = "TransNetDemo")
22 mapf2 = system.file("extdata", "mapping_file.rand.2.tsv", package = "TransNetDemo")
23
24 # microbe files
25 microbef1 = system.file("extdata", "microbe_file_1.tsv", package = "TransNetDemo")
26 microbef2 = system.file("extdata", "microbe_file_2.tsv", package = "TransNetDemo")
27
28 # microbes
29 Comp_microbes = Compare_groups(mapf1, microbef1, sampleIdColName, factorColName , groupA, groupB, microbeSymbolColName)
30
31 # Select differentially abundant elements:
32 ##### (i) using a significance threshold #####
33 Sign_microbes = Comp_microbes[which(Comp_microbes$FDR < 0.05),]
34 # this data has been saved as "Sign_microbes_precomputed_1"
35 ##### ##### #####
36 # OR
37 ##### (ii) in case you have multiple datasets, we recommend meta-analysis #####
38 ## we have already run these steps and stored the data under the variable "Sign_microbes_metaanalysis_precomputed" ##
39 Comp_microbes1 = Comp_microbes
40 Comp_microbes2 = Compare_groups(mapf2, microbef2, sampleIdColName, factorColName , groupA, groupB, microbeSymbolColName)
41 numbDatasets=2 # number of datasets
42
43 s_df = merge(Comp_microbes1, Comp_microbes2, by="row.names")
44 rownames(s_df) = rownames(Comp_microbes1)
45 s_df = Check_consistency(s_df, foldchVar, 1, numbDatasets)
46 comb_in_df = Calc_combined(s_df)
47 Sign_microbes = Apply_sign_cutoffs(comb_in_df, individualPvalueCutoff, combinedPvalueCutoff, combinedFDRcutoff )
48
49 # if this returns TRUE, you did everything correct!
50 identical(rownames(Sign_microbes), rownames(Sign_microbes_metaanalysis_precomputed))
51 #write.csv(Sign_microbes,"Sign_microbes_File.csv", quote=FALSE)
52 ##### ##### #####
53
```

```

54 # microbe pairs
55
56 Corr_pairs = Correlation_in_group(mapf1, microbef1, sampleIdColName, factorColName, groupA, microbeSymbolColName, rownames(Sign_microbes))
57
58 # Select significant correlations:
59 ##### (i) using a significance threshold #####
60 Sign_pairs = Corr_pairs[which(Corr_pairs$pvalue < 0.05 & Corr_pairs$FDR < 0.1),]
61 #####
62 # OR
63 ##### (ii) in case you have multiple datasets, we recommend meta-analysis #####
64 ## we have already run these steps and stored the data under the variable "Sign_microbepairs_metaanalysis_precomputed" ##
65 Corr_pairs1 = Corr_pairs
66 Corr_pairs2 = Correlation_in_group(mapf2, microbef2, sampleIdColName, factorColName, groupA, microbeSymbolColName, rownames(Sign_microbes))
67
68 s_df = merge(Corr_pairs1, Corr_pairs2, by="row.names")
69 rownames(s_df) = rownames(Corr_pairs1)
70 s_df = Check_consistency(s_df, "Coefficient", 0, numbDatasets)
71 comb_in_df = Calc_combined(s_df)
72 Sign_pairs = Apply_sign_cutoffs(comb_in_df, individualPvalueCutoff, combinedPvalueCutoff, combinedFDRcutoff )
73
74 # if this returns TRUE, you did everything correct!
75 identical(rownames(Sign_pairs), rownames(Sign_microbepairs_metaanalysis_precomputed))
76 #write.csv (Sign_pairs,"Sign_microbes_pairs_File.csv", quote=FALSE)
77 #####
78
79
80 microbes_df = Calc_median_val(Sign_microbes, foldchVar)
81 identical(microbes_df, Microbe_df_precomputed)
82 pairs_df = Calc_median_val(Sign_pairs, "Coefficient")
83 outNetwork = Puc_compatible_network(pairs_df, microbes_df)
84
85 # if this returns TRUE, you did everything correct!
86 identical(outNetwork[,c("partner1", "partner2")], Microbe_network_precomputed[,c("partner1", "partner2")])
87 #write.csv (outNetwork,"microbe-networkFile.csv", quote=FALSE)
88
89 cluster1 = Identify_subnetworks(outNetwork)
90 summary(cluster1)
91
92 # if this returns TRUE, you did everything correct!
93 identical(get.edgelist(cluster1), get.edgelist(microbes_mcode_cluster1_precomputed)) # OR #sum(get.adjacency(cluster1) != get.adjacency(mic
94 #write_graph(cluster1, "microbes_mcode_cluster1_edges.txt", "ncol")
95
96 plot(cluster1, vertex.label=NA, vertex.size=3)
97

```

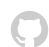



richrr added code to identify the top gene or microbe and label the importan... 97f87b8 2 days ago

1 contributor

156 lines (118 sloc) | 5.74 KB

Raw Blame History

```
1 #library(TransNetDemo)
2 library(stringr)
3 library(ProNet)
4 library(igraph)
5 library(ggplot2)
6
7
8 individualPvalueCutoff = 0.3
9 combinedPvalueCutoff = 0.05
10 combinedFDRCutoff = 0.2
11
12 # groups to compare
13 groupA = "HFHS"
14 groupB = "NCD"
15 sampleIdColName = "SampleID"
16 factorColName = "Factor"
17 gene_microbeSymbolColName = "IdSymbol"
18 # fold change column based on mean or median
19 foldchVar = "FoldChange_HFHS_NCD" # or "FoldChange_Median_HFHS_NCD"
20
21 # map files
22 mapf1 = system.file("extdata", "mapping_file.rand.1.tsv", package = "TransNetDemo")
23 mapf2 = system.file("extdata", "mapping_file.rand.2.tsv", package = "TransNetDemo")
24
25 # gene_microbe files
26 gene_microbef1 = system.file("extdata", "gene_microbe_file_1.tsv", package = "TransNetDemo")
27 gene_microbef2 = system.file("extdata", "gene_microbe_file_2.tsv", package = "TransNetDemo")
28
29 pairs = expand.grid(V(genes_mcode_cluster1_precomputed)$name, V(microbes_mcode_cluster1_precomputed)$name)
30
31 # gene_microbe pairs
32 Corr_pairs = Correlation_in_group(mapf1, gene_microbef1, sampleIdColName, factorColName, groupA, gene_microbeSymbolColName, NA, pairs)
33
34 # Select significant correlations:
35 ##### (i) using a significance threshold #####
36 Sign_pairs = Corr_pairs[which(Corr_pairs$pvalue < 0.05 & Corr_pairs$FDR < 0.1),]
37 ##### ##### #####
38 # OR
39 ##### (ii) in case you have multiple datasets, we recommend meta-analysis #####
40 ## we have already run these steps and stored the data under the variable "Sign_gene_microbe_pairs_metaanalysis_precomputed" ##
41 Corr_pairs1 = Corr_pairs
42 Corr_pairs2 = Correlation_in_group(mapf2, gene_microbef2, sampleIdColName, factorColName, groupA, gene_microbeSymbolColName, NA, pairs)
43 numbDatasets=2 # number of datasets
44
45 s_df = merge(Corr_pairs1, Corr_pairs2, by="row.names")
46 rownames(s_df) = rownames(Corr_pairs1)
47 s_df = Check_consistency(s_df, "Coefficient", 0, numbDatasets)
48 comb_in_df = Calc_combined(s_df)
49 Sign_pairs = Apply_sign_cutoffs(comb_in_df, individualPvalueCutoff, combinedPvalueCutoff, combinedFDRCutoff )
50
51 # if this returns TRUE, you did everything correct!
52 identical(Sign_pairs, Sign_gene_microbe_pairs_metaanalysis_precomputed)
53 #write.csv (Sign_pairs, "Sign_gene_microbes_pairs_File.csv", quote=FALSE)
```

```

54 #####
55
56 genes_df = rbind(Gene_df_precomputed, Microbe_df_precomputed)
57 pairs_df = Calc_median_val(Sign_pairs, "Coefficient")
58 outNetwork = Puc_compatible_network(pairs_df, genes_df)
59 #write.csv (outNetwork,"gene_microbe-networkFile.csv", quote=FALSE)
60
61
62 g = graph_from_data_frame(outNetwork,directed = F, vertices = NULL)
63 # if this returns TRUE, you did everything correct!
64 identical(get.edgelist(g), get.edgelist(Gene_Microbe_network_precomputed))
65 #write_graph(g, "gene_microbe_edges.txt", "ncol")
66
67
68 # create TK (bipartite) network using:
69 # (i) genes_mcode_cluster1_precomputed
70 # (ii) microbes_mcode_cluster1_precomputed
71 # (iii) Gene_Microbe_network_precomputed
72
73
74 net1 = get.edgelist(genes_mcode_cluster1_precomputed)
75 head(net1)
76
77 net2 = get.edgelist(microbes_mcode_cluster1_precomputed)
78 head(net2)
79
80 net3 = get.edgelist(Gene_Microbe_network_precomputed)
81 head(net3)
82
83 TK_Network = graph_from_data_frame(rbind(net1, net2, net3), directed = F)
84 print(TK_Network, e=TRUE, v=TRUE)
85
86 # if this returns TRUE, you did everything correct!
87 identical(get.edgelist(TK_Network), get.edgelist(TK_Network_precomputed))
88 #write_graph(TK_Network, "Trans_Kingdom_NetworkFile.txt", "ncol")
89 #write_graph(TK_Network, "Trans_Kingdom_NetworkFile_indices.txt")
90
91
92 # write the mapping of nodes name to indices and group
93 nodes = data.frame()
94 for (vertex in V(TK_Network)) {
95     Name = V(TK_Network)$name[vertex]
96     Id = vertex
97     Group = ""
98     if(Name %in% as.vector(net1)){
99         Group = "gene"
100     } else {
101         Group = "microbe"
102     }
103     nodes = rbind(nodes, cbind(Name, Id, Group))
104 }
105 colnames(nodes)
106 #write.table(nodes, "Trans_Kingdom_NetworkFile_nodes.txt", quote=F, row.names = F, sep=' ', col.names = T)
107
108 # calc bipartite betweenness centrality
109 # to find important genes
110 #FromNodes = as.numeric(nodes[nodes[,3]=="gene",2])
111 #ToNodes = as.numeric(nodes[nodes[,3]=="microbe",2])
112
113 # to find important microbes
114 FromNodes = as.numeric(nodes[nodes[,3]=="microbe",2])
115 ToNodes = as.numeric(nodes[nodes[,3]=="gene",2])
116
117 allPairs = expand.grid(FromNodes,ToNodes)
118 myNetwork = TK_Network
119 sumAllFractionsForAllNodes = Calc_bipartite_betweenness centrality(allPairs, FromNodes, myNetwork)
120
121 head(sumAllFractionsForAllNodes)
122
123 # calculate node(s) with max. betweenness centrality
124 forPlot = colSums(sumAllFractionsForAllNodes)
125 topThree = sort(forPlot, decreasing = T)[1:3]

```

```

126 TopNode = as.integer(names(topThree[1]))
127
128 TopNodeName = nodes[TopNode, "Name"]
129
130 TK_Network = set_vertex_attr(TK_Network, "type", index = nodes$Id, as.factor(nodes$Group))
131 # no labels
132 #plot(TK_Network, vertex.label = NA, layout=layout_as_tree, vertex.color=c( "pink", "skyblue")[1+(V(TK_Network)$type==1)], vertex.size=4)
133
134 # label only the important node
135 plot(TK_Network, vertex.label = ifelse(V(TK_Network)$name==TopNodeName, V(TK_Network)$name, NA),
136       layout=layout_as_tree, vertex.color=c( "pink", "skyblue")[1+(V(TK_Network)$type==1)], vertex.size=4, vertex.label.dist=0.15, vertex.la
137
138 # label only the microbe nodes
139 #plot(TK_Network, vertex.label = ifelse(nodes[which(nodes$Name==V(TK_Network)$name), "Group"]=='microbe', V(TK_Network)$name, NA),
140 #     layout=layout_as_tree, vertex.color=c( "pink", "skyblue")[1+(V(TK_Network)$type==1)], vertex.size=4, vertex.label.dist=0.15, vertex.
141
142 legend("topright",
143       legend = unique(nodes$Group),
144       col = c("skyblue" , "pink"),
145       lty= 1,
146       lwd = 5,
147       cex=.7
148 )
149
150
151
152 # plot in two rows
153 #ltyes = c(TRUE, FALSE)[1+(V(TK_Network)$type==1)]
154 #plot(TK_Network, vertex.label = NA, vertex.size=3, layout=layout_as_bipartite(TK_Network,ltyes, hgap = 500), vertex.color=c( "pink", "sky
155

```

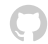



richrr finalized code with legends

643b5e8 19 days ago

1 contributor

66 lines (49 sloc) | 1.92 KB

Raw Blame History

```
1 #library(TransNetDemo)
2 library(gplots)
3
4
5 ##### extract inputs - study 1 #####
6
7 # groups to compare
8 groupA = "HFHS"
9 groupB = "NCD"
10 sampleIdColName = "SampleID"
11 factorColName = "Factor"
12 geneSymbolColName = "IdSymbol"
13
14 # map files
15 mapf1 = system.file("extdata", "mapping_file.rand.1.tsv", package = "TransNetDemo")
16
17 # read the mapping file
18 map1 = read.delim(mapf1, header=T)
19 rownames(map1) = map1[,sampleIdColName]
20
21 # select samples from groups
22 hfhs_samples1 = as.vector(map1[which(map1[,factorColName] == groupA),sampleIdColName])
23 ncd_samples1 = as.vector(map1[which(map1[,factorColName] == groupB),sampleIdColName])
24
25 # colors as per the group
26 samplecolors <- c(rep("magenta",25) , rep("blue",25))
27
28 # gene files
29 genef1 = system.file("extdata", "gene_file_1.tsv", package = "TransNetDemo")
30
31 # read the data file
32 genes1 = read.delim(genef1, header=T, check.names = F, row.names=1)
33
34 # make the heat map
35 dataset1=genes1[rownames(Sign_genes_precomputed_1), c(hfhs_samples1, ncd_samples1)]
36 dim(dataset1)
37 heatmap.2(as.matrix(dataset1), col=redgreen(75), ColSideColors=samplecolors, scale="row", key=TRUE, symkey=FALSE, density.info="none", trac
38
39 legend("topright",
40       legend = unique(map1$Factor),
41       col = c("magenta" , "blue"),
42       lty= 1,
43       lwd = 5,
44       cex=.7
45 )
46
47 # microbe files
48 microbef1 = system.file("extdata", "microbe_file_1.tsv", package = "TransNetDemo")
49
50 # read the data file
51 microbes1 = read.delim(microbef1, header=T, check.names = F, row.names=1)
52
53 # make the heat map
```



```
54 dataset1=microbes1[rownames(Sign_microbes_precomputed_1), c(hfhs_samples1, ncd_samples1)]
55 dim(dataset1)
56 heatmap.2(as.matrix(dataset1), col=redgreen(75), ColSideColors=samplecolors, scale="row", key=TRUE, symkey=FALSE, density.info="none", trac
57
58 legend("topright",
59       legend = unique(map1$Factor),
60       col = c("magenta" , "blue"),
61       lty= 1,
62       lwd = 5,
63       cex=.7
64 )
65
```

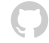

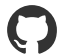

richrr Updated package

f30fa7f 26 days ago

1 contributor

24 lines (22 sloc) | 1.23 KB

Raw

Blame

History

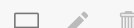

```
1 #' Select significant elements
2 #'
3 #' This function applies the following significance cutoffs
4 #' individual p-value < 0.3; combined p-value < 0.05; fdr < 0.1
5 #'
6 #' @param df, individualPvalueCutoff, combinedPvalueCutoff, combinedFDRcutoff
7 #' @return A matrix with statistics for signifcant elements
8 #' @export
9 Apply_sign_cutoffs = function(df, individualPvalueCutoff = 0.3, combinedPvalueCutoff = 0.05, combinedFDRcutoff = 0.1){
10   # find significant in individual pvalue: all of the pvalues for all of the datasets for each element must be smaller than threshold
11   # find pvalue data
12   # if it is a single dataset it becomes a vector so adding the drop=FALSE
13   pvalueData = df[,grep("pvalue",colnames(df)), drop=FALSE]
14   print(head(pvalueData))
15   pvalueData = as.matrix(pvalueData)
16   pvalueData = apply(pvalueData,2,function(x){as.numeric(as.vector(x))})
17
18   # calculate the largest pvalue among all datasets for each gene, this largest pvalue must be smaller than threshold
19   passIndividualPvalue = apply(pvalueData,1,max)<individualPvalueCutoff
20   Sign_elements = df[passIndividualPvalue,]
21   Sign_elements <- Sign_elements[Sign_elements$"combinedPvalue" < combinedPvalueCutoff & Sign_elements$"combinedFDR" < combinedFDRcutoff,]
22   return(Sign_elements)
23 }
```

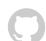



richrr Updated package

f30fa7f 26 days ago

1 contributor

32 lines (26 sloc) | 1020 Bytes

Raw Blame History

```
1 #' Calc_bipartite_betweeness_centrality
2 #'
3 #' This function calculates bipartite_betweeness_centrality for each given element pair
4 #'
5 #' @param allPairs, FromNodes, myNetwork
6 #' @return A data frame with statistics for each element
7 #' @export
8 Calc_bipartite_betweeness_centrality = function(allPairs, FromNodes, myNetwork){
9
10     sumAllFractionsForAllNodes = Get_template_matrix(FromNodes, allPairs)
11     sumAllFractionsForAllNodes = as.data.frame(sumAllFractionsForAllNodes)
12     #print(sumAllFractionsForAllNodes)
13     counts = apply(as.matrix(allPairs),1,Get_shortest_paths,myNetwork)
14     #print(counts)
15
16
17     z = lapply(counts, function(x){
18         if(nrow(x)>0){
19             #print(x)
20             columnsForUpdate = as.character(intersect(colnames(x),FromNodes))
21             #print(columnsForUpdate)
22             rowsForUpdate = rownames(x)
23             #print(rowsForUpdate)
24             #print(x[1, columnsForUpdate])
25             sumAllFractionsForAllNodes[rowsForUpdate,columnsForUpdate] <- x[1,columnsForUpdate]
26         }
27     })
28
29     return(sumAllFractionsForAllNodes)
30 }
31
```

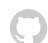



richrr Updated package f30fa7f 26 days ago

1 contributor

29 lines (26 sloc) | 1.02 KB

Raw Blame History

```
1 #' Calc combined p value across expts.
2 #'
3 #' This function code for calc combined p value across datasets.
4 #'
5 #' @param data frame
6 #' @return A matrix with combined pvalue and fdr
7 #' @export
8 Calc_combined = function(s_df){
9   pvalueData = s_df[,grep("pvalue",colnames(s_df)), drop=FALSE]
10  head(pvalueData)
11
12  total_numb_input_files = ncol(pvalueData)
13  interestedPvalueData = as.matrix(pvalueData)
14  interestedPvalueData = apply(interestedPvalueData,2,function(x){as.numeric(as.vector(x))})
15  combinedPvalue = apply(interestedPvalueData,1
16    ,function(pvalues){
17      pvalues = pvalues[!is.na(pvalues)]
18      statistics = -2*log(prod(pvalues))
19      degreeOfFreedom = 2*length(pvalues)
20      combined = 1-pchisq(statistics,degreeOfFreedom)
21    }
22  )
23  #calculate FDR for combined pvalue
24  combinedFDR = p.adjust(combinedPvalue,method="fdr")
25  comb_in_df = cbind(s_df, combinedPvalue, combinedFDR)
26
27  return(comb_in_df)
28 }
```

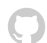



richrr Updated package

f30fa7f 26 days ago

1 contributor

19 lines (15 sloc) | 425 Bytes

Raw

Blame

History

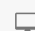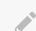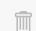

```
1 #' Calculate correlation between vectors
2 #'
3 #' This function calculate correlation between vectors
4 #'
5 #' @param pair, df, samples
6 #' @return A matrix with statistics for each element pair
7 #' @export
8 Calc_cor = function(pair, df, samples){
9   idxs = as.vector(samples)
10
11   c1 = as.numeric(df[pair[1], idxs])
12   c2 = as.numeric(df[pair[2], idxs])
13
14   p = cor.test(c1,c2)
15   outLine = as.matrix(c(p$estimate,p$p.value))
16   outLine
17 }
18
```

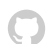



richrr Updated package f30fa7f 26 days ago

1 contributor

20 lines (19 sloc) | 723 Bytes

Raw Blame History

```
1 #' Calculate median coefficient or fold change
2 #'
3 #' This function calculate median coefficient or fold change for each element
4 #'
5 #' @param df, pattern
6 #' @return A data frame with statistics for each element
7 #' @export
8 Calc_median_val = function(df, pattern){
9   Colnames = colnames(df)[grep(pattern,colnames(df))]
10  interestedData = df[,Colnames,drop=F]
11  interestedData = as.matrix(interestedData)
12  interestedData = apply(interestedData,2,function(x){as.numeric(as.vector(x))})
13  combined = apply(interestedData,1, function(x){round(median(x, na.rm = TRUE), 3)})
14  oldColnames = colnames(df)
15  df = cbind(df,combined)
16  colnames(df) = c(oldColnames, paste("combined", pattern, sep=''))
17  print(head(df))
18  return(df)
19 }
```

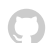



richrr Updated package f30fa7f 26 days ago

1 contributor

23 lines (19 sloc) | 855 Bytes

Raw Blame History

```
1 #' Check consistent direction
2 #'
3 #' This function selects elements showing consistent direction across datasets
4 #'
5 #' @param df, patternToSearch, threshold
6 #' @return A matrix with elements showing consistent direction across datasets
7 #' @export
8 Check_consistency = function(s_df, pattern, Threshold, numbDatasets=2){
9   # select the data of interest
10  patternData = s_df[,grep(pattern,colnames(s_df)), drop=FALSE]
11  head(patternData)
12
13  rows_passing_consistency = c()
14  res_pos = apply(patternData, 1, function(x) sum(x > Threshold))
15  rows_passing_consistency = c(rows_passing_consistency, names(res_pos[res_pos==numbDatasets]))
16
17  res_neg = apply(patternData, 1, function(x) sum(x < Threshold))
18  rows_passing_consistency = c(rows_passing_consistency, names(res_neg[res_neg==numbDatasets]))
19
20  s_df = s_df[rows_passing_consistency, -1]
21  return(s_df)
22 }
```

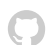



richrr Updated package

f30fa7f 26 days ago

1 contributor

45 lines (34 sloc) | 1.69 KB

Raw Blame History

```
1 #' Compare groups
2 #'
3 #' This function compares the values in two groups for each element
4 #'
5 #' @param mapFile, geneFile, sampleIdColName, factorColName, groupA, groupB, geneSymbolColName
6 #' @return A data frame with statistics for each element
7 #' @export
8 Compare_groups = function(mapFile, geneFile, sampleIdColName, factorColName, groupA, groupB, geneSymbolColName){
9
10 ##### extract inputs #####
11 # read the mapping file
12 map = read.delim(mapFile, header=T)
13 rownames(map) = map[,sampleIdColName]
14 head(map)
15
16 # select samples from groups
17 hfhs_samples = map[which(map[,factorColName] == groupA),]
18 head(hfhs_samples)
19 ncd_samples = map[which(map[,factorColName] == groupB),]
20 head(ncd_samples)
21
22 # read the data file
23 genes = read.delim(geneFile, header=T, check.names = F)
24 rownames(genes) = genes[,geneSymbolColName]
25 head(genes)
26
27
28 ##### calc diff abundance #####
29 out = sapply(rownames(genes), Diff_abundance, genes, rownames(hfhs_samples), rownames(ncd_samples))
30
31
32 ##### format output #####
33 Comp_genes = t(out)
34 colnames(Comp_genes) = c(paste("Mean", groupA, sep="_"), paste("Mean", groupB, sep="_"), paste("FoldChange", groupA, groupB, sep="_"),
35 paste("Median", groupA, sep="_"), paste("Median", groupB, sep="_"), paste("FoldChange", "Median", groupA, groupB, sep="
36
37
38 ##### calculate FDR #####
39 FDR = p.adjust(Comp_genes[, "pvalue"], method="fdr")
40 oldColnames = colnames(Comp_genes)
41 Comp_genes = as.data.frame(cbind(Comp_genes, FDR))
42
43 return(Comp_genes)
44 }
```

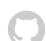





richrr Updated package

f30fa7f 26 days ago

1 contributor

54 lines (42 sloc) | 1.86 KB

Raw

Blame

History



```
1 #' Correlation_in_group
2 #'
3 #' This function calculates correlation in a group for each element pair
4 #'
5 #' @param mapFile, geneFile, sampleIdColName, factorColName, groupA, geneSymbolColName, selected genes
6 #' @return A data frame with statistics for each element
7 #' @export
8 Correlation_in_group = function(mapFile, geneFile, sampleIdColName, factorColName, groupA, geneSymbolColName, selected_genes, usepairs=NA)
9
10 ##### extract inputs #####
11 # read the mapping file
12 map = read.delim(mapFile, header=T)
13 rownames(map) = map[,sampleIdColName]
14 head(map)
15
16 # select samples from group
17 hfhs_samples = map[which(map[,factorColName] == groupA),]
18 head(hfhs_samples)
19
20 # read the data file
21 genes = read.delim(geneFile, header=T, check.names = F)
22 rownames(genes) = genes[,geneSymbolColName]
23 head(genes)
24
25 # create gene pairs if not already provided
26 pairs = ''
27 if(is.na(usepairs)) {
28   pairs = t(combn(selected_genes,2))[,2:1]
29 }else{
30   pairs = usepairs
31 }
32 head(pairs)
33
34
35 ##### calculate correlation for each pair #####
36 Corr_pairs = apply(pairs, 1, Calc_cor, genes, rownames(hfhs_samples))
37
38
39 ##### format output #####
40 # add the pair as the column name
41 colnames(Corr_pairs) = paste(as.vector(pairs[,1]),as.vector(pairs[,2]),sep="<=>")
42 # the pairs become row names; and the corr coeff and pvalue are the column names
43 Corr_pairs = t(Corr_pairs)
44 # append method used to column labels
45 colnames(Corr_pairs) = c(paste(groupA, "Coefficient",sep="_"), "pvalue")
46
47
48 ##### calculate FDR #####
49 FDR = p.adjust(Corr_pairs[,colnames(Corr_pairs)[grep("pvalue",colnames(Corr_pairs))]],method="fdr")
50 Corr_pairs = as.data.frame(cbind(Corr_pairs, FDR))
51
52 return(Corr_pairs)
53 }
```

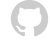



richrr Updated package

f30fa7f 26 days ago

1 contributor

29 lines (22 sloc) | 790 Bytes

Raw

Blame

History

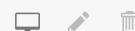

```
1 #' Compare abundance between groups for an element
2 #'
3 #' This function compares the values in two groups for an element
4 #'
5 #' @param element, df, samplesA, samplesB
6 #' @return A matrix with statistics for each element
7 #' @export
8 Diff_abundance = function(element, df, samplesA, samplesB){
9   samplesA = as.vector(samplesA)
10  samplesB = as.vector(samplesB)
11
12  Vec1 = as.numeric(df[element, samplesA])
13  Vec2 = as.numeric(df[element, samplesB])
14
15  meanVec1 = mean(Vec1)
16  meanVec2 = mean(Vec2)
17  fold_change_mean = meanVec1/meanVec2
18
19  medianVec1 = median(Vec1)
20  medianVec2 = median(Vec2)
21  fold_change_median = medianVec1/medianVec2
22
23  p = t.test(Vec1, Vec2)
24
25  Result = as.matrix(c(meanVec1, meanVec2, fold_change_mean, medianVec1 , medianVec2 , fold_change_median, p$p.value))
26
27  Result
28 }
```

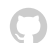



richrr Updated package

f30fa7f 26 days ago

1 contributor

34 lines (30 sloc) | 1.58 KB

Raw

Blame

History

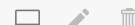

```
1 #' Get counts for all shortest paths between given nodes in a bipartite networks
2 #'
3 #' This function calculates shortest paths between given nodes in a bipartite networks
4 #'
5 #' @param pair, myNetwork, sumAllFractionsForAllNodes
6 #' @return Updates the row in pair,sumAllFractionsForAllNodes
7 #' @export
8 Get_shortest_paths = function(pair,myNetwork){ # for each row in "sumAllFractionsForAllNodes", calculate the values for the columns and up
9   #print(pair)
10  allShortestPaths = get.all.shortest.paths(myNetwork, from= pair[1], to= pair[2], mode = "all", weights=NULL) # calculate the shortest pat
11  #print(allShortestPaths)
12
13  count = data.frame()
14  if (length(allShortestPaths$res)==0){ # if there is no shortest path, do not update "sumAllFractionsForAllNodes"
15    #fractions = cbind(FromNodes,rep(0,times=length(FromNodes)))
16    #print("no paths")
17  }else{
18    allShortestPaths = do.call(rbind,allShortestPaths$res) # a matrix with each row containing a shortest path between the two nodes
19    #print(allShortestPaths)
20
21    nodesInPath = as.vector(allShortestPaths[,c(-1,-ncol(allShortestPaths))]) # get rid of the two nodes that are under study, the nodes in
22    #print(nodesInPath)
23    count = table(as.factor(nodesInPath))/nrow(allShortestPaths) # for each node in the shortest paths, calculate how many times(normalized
24    #print(count)
25
26    v = names(count)
27    count = data.frame(rbind((count)))
28    colnames(count) = v
29    rownames(count) = paste(pair, collapse='_')
30    #print(count)
31  }
32  count
33 }
```

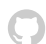



richrr Updated package

f30fa7f 26 days ago

1 contributor

22 lines (21 sloc) | 1.05 KB

Raw

Blame

History

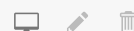

```
1 #' Get_template_matrix
2 #'
3 #' This function creates a matrix , with each entry recording for each node(in a column),
4 #' if it appears(not 1 or 0, but a normalized number, since there can be more
5 #' than one shortest path between a pair of nodes) in the shortest path between a
6 #' pair of nodes(in a row), the rows contain all pairs of nodes between two groups.
7 #' Thus the sum of each column is the betweenness centrality for the node(in that column)
8 #'
9 #' @param FromNodes, allPairs
10 #' @return A matrix with rownames (source-target) and column names as nodes from source nodes set.
11 #' @export
12 Get_template_matrix = function(FromNodes, allPairs){
13   sumAllFractionsForAllNodes = matrix(0,ncol=length(FromNodes)
14   ,nrow=nrow(allPairs)
15   ,dimnames= list(
16     paste(as.vector(t(allPairs[,1])),as.vector(t(allPairs[,2])),sep="_")
17     , as.character(FromNodes)
18   )
19 )
20 return(sumAllFractionsForAllNodes)
21 }
```

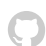



richrr Updated package

f30fa7f 26 days ago

1 contributor

37 lines (30 sloc) | 1.16 KB

Raw

Blame

History

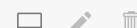

```
1 #' Identify top subnetwork
2 #'
3 #' This function returns the induced subgraph of the nodes in the top cluster using mcode
4 #'
5 #'
6 #' @param network in which to identify subnetworks
7 #' @return A data frame (network) that is Puc compatible
8 #' @export
9 Identify_subnetworks = function(outNetwork){
10
11   # identify subnetworks
12   dfNetwork = outNetwork[,c("partner1", "partner2", "combinedCoefficient")]
13   print(head(dfNetwork))
14
15   #?graph_from_data_frame
16   # http://kateto.net/networks-r-igraph
17   g = graph_from_data_frame(dfNetwork,directed = F, vertices = NULL)
18   print(g, e=TRUE, v=TRUE)
19   # see the edges and vertices
20   #E(g) ; V(g) ; edge_attr(g) ; vertex_attr(g)
21
22   # plots the networks
23   #cluster(g,method="MCODE",layout="fruchterman.reingold")
24   #cluster(g,method="FN",layout="fruchterman.reingold")
25
26   #https://cran.r-project.org/web/packages/ProNet/vignettes/Tutorial.pdf
27   # identify clusters
28   result <- mcode(g,vwp=0.5,haircut=TRUE,fluff=FALSE,fdt=0.8,loops=FALSE)
29   summary(result$COMPLEX)
30
31   # plot the top cluster
32   cluster1<-induced.subgraph(g,result$COMPLEX[[1]])
33   #visualization(cluster1,node.size=4,node.label=V(cluster1)$name,node.label.color="blue")
34
35   return(cluster1)
36 }
```

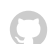



richrr Updated package

f30fa7f 26 days ago

1 contributor

83 lines (66 sloc) | 3.69 KB

Raw

Blame

History

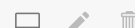

```
1 #' Calculate network that satisfies the PUC criteria
2 #'
3 #' This function keeps edges that satisfy expected correlation and fold change relationships
4 #'
5 #'
6 #' @param pairs_df, genes_df
7 #' @return A data frame (network) that is Puc compatible
8 #' @export
9 Puc_compatible_network = function(pairs_df, genes_df){
10 #-----
11 # calculate PUC
12 #-----
13
14 #change out format to partner1 partner2 for PUC
15 row_names_pairs_df = rownames(pairs_df)
16 head(row_names_pairs_df)
17 pair = stringr::str_split( row_names_pairs_df , "<==>")
18 pairs = t(as.data.frame(pair))
19
20 colnames(pairs) = c("partner1","partner2")
21 pairs_df = apply(pairs_df, 2, function(x) as.numeric(as.character(x))) # convert the chars to numeric
22 rownames(pairs) = row_names_pairs_df # remove this if you do not want row names
23 outForPUC = cbind(pairs,pairs_df)
24 head(outForPUC)
25
26
27 # select pvalue columns
28 grep_cols_c = grep("pvalue", colnames(outForPUC), value=TRUE, fixed=TRUE)
29 # select "combinedPvalue", "combinedFDR", "combinedCoefficient"
30 grep_cols_c = append(grep_cols_c, grep("combined", colnames(outForPUC), value=TRUE, fixed=TRUE) )
31 # select the partner columns
32 g_grep_cols = c("partner1","partner2", grep_cols_c)
33
34 outForPUC = outForPUC[,g_grep_cols]
35 head(outForPUC)
36
37
38 # attach the foldChange information for each partner
39 FoldChangeCol = grep(paste("combined", foldchVar, sep=''), colnames(genes_df), value=TRUE, fixed=TRUE)
40 FoldMetab1_InPair = genes_df[as.vector(outForPUC[, "partner1"]), FoldChangeCol, drop=F]
41 colnames(FoldMetab1_InPair) = c("partner1_FoldChange")
42 FoldMetab2_InPair = genes_df[as.vector(outForPUC[, "partner2"]), FoldChangeCol, drop=F]
43 colnames(FoldMetab2_InPair) = c("partner2_FoldChange")
44 outForPUC = cbind(outForPUC,FoldMetab1_InPair,FoldMetab2_InPair)
45 head(outForPUC)
46
47 # calculate correlation Direction For combined correlation coefficient of interest
48 # at this point we only have the consistent pairs left, so the value of combined corr coeff is ok to use
49 interestedCoefficientColNames = grep("Coefficient", colnames(outForPUC), value=TRUE, fixed=TRUE)
50 print(interestedCoefficientColNames)
51 interestedCorrelationData = outForPUC[,interestedCoefficientColNames, drop=FALSE]
52 interestedCorrelationData = apply(interestedCorrelationData,2,function(x){as.numeric(as.vector(x))})
53 correlationDirection = interestedCorrelationData/abs(interestedCorrelationData)
```

```

54
55
56 # calculate fold change direction for each partner
57 FoldChangeColnames = colnames(outForPUC)[grep("FoldChange",colnames(outForPUC))] # since this is using the combined fold change calculate
58
59 FoldChangeData = outForPUC[,FoldChangeColnames]
60 FoldChangeDirection = (FoldChangeData-1)/abs(FoldChangeData-1)
61 names(FoldChangeDirection) = c()
62 colnames(FoldChangeDirection) = paste(colnames(FoldChangeData),"Direction",sep="_")
63
64 # calculate if fold change direction are the same for the two partners
65 IfFoldChangeDirectionMatch = apply(FoldChangeDirection,1,prod)
66 names(IfFoldChangeDirectionMatch) = c()
67 colnames(correlationDirection) = c()
68
69 # use "correlationDirection" and "IfFoldChangeDirectionMatch" to calc PUC,
70 # i.e. if these two are the same PUC=1 (good)
71 PUC = IfFoldChangeDirectionMatch * correlationDirection
72 outForPUC = cbind(outForPUC,correlationDirection,FoldChangeDirection,IfFoldChangeDirectionMatch,PUC)
73 head(outForPUC)
74
75 #write.csv(outForPUC, "PUC-output.csv" ,row.names=FALSE)
76
77 # find PUC expected
78 out = outForPUC[outForPUC[,"PUC"]==1 ,]
79 outNetwork = out[!is.na(out$"PUC"),] # remove the rows with 'NA' in PUC columns
80 return(outNetwork)
81
82 }

```

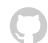

Supplement: NIHMS1029749-supplement-File_S1.pdf [file NIHMS1029749-supplement-File_S1.pdf]
